# Supplementary material for: Evaluation of Anthropogenic Emissions and Ozone Pollution in the North China Plain: Insights from the Air Chemistry Research in Asia (ARIAs) Campaign
Source: Copernicus journal article supplement (doi:10.5194/acp-2019-248), 2019-03-29

**Supplementary Material of**

**Evaluation of Anthropogenic Emissions and Ozone Pollution in the North China Plain:  
Insights from the Air Chemistry Research in Asia (ARIAs) Campaign**

Hao He<sup>1</sup>, Xinrong Ren<sup>1,2,3</sup>, Sarah E. Benish<sup>1</sup>, Zhanqing Li<sup>1,4,5</sup>, Fei Wang<sup>5,6</sup>, Yuying Wang<sup>5</sup>,  
Timothy P. Canty<sup>1</sup>, Xiaobo Dong<sup>7</sup>, Feng Lv<sup>7</sup>, Yongtao Hu<sup>8</sup>, Tong Zhu<sup>9</sup>, and Russell R.  
Dickerson,<sup>1,4</sup>

<sup>1</sup>Department of Atmospheric and Oceanic Science, University of Maryland, College Park, MD  
20742, USA

<sup>2</sup>Air Resources Laboratory, National Oceanic and Atmospheric Administration, College Park,  
MD 20742, USA

<sup>3</sup>Cooperative Institute for Climate and Satellites, University of Maryland, College Park,  
Maryland, USA

<sup>4</sup>Earth System Science Interdisciplinary Center, University of Maryland, College Park, MD  
20740, USA

<sup>5</sup>College of Global Change and Earth System Science, Beijing Normal University, Beijing,  
100875, China

<sup>6</sup>Key Laboratory for Cloud Physics, Chinese Academy of Meteorological Sciences, Beijing,  
100081, China

<sup>7</sup>Weather Modification Office of Hebei Province, Shijiazhuang, 050021, China

<sup>8</sup>School of Civil & Environmental Engineering, Georgia Institute of Technology, Atlanta, GA  
30332, USA

<sup>9</sup>College of Environmental Sciences and Engineering, Peking University, Beijing 100871, China

Table S1 shows the aircraft instrumentation on the Y12 aircraft during ARIAs. For synchronization of aircraft measurements, we first synchronized Picarro measurements of CO<sub>2</sub>, CO and CH<sub>4</sub>, which have a 6-second lag time that takes for a plume to transport from the aircraft sample inlet to the Picarro cavity to be detected the analyzer. The lag time was determined by introducing a pulse of CO<sub>2</sub>/CO/CH<sub>4</sub> calibration standard into the sample inlet and then measure the time it takes for the Picarro detects the pulsed signals. All other measurements were then synchronized based on concurrent peak appearance of these measurements and the Picarro measurements.

**Table S1.** UMD Aircraft Instrumentation

| Variable                                                                | Method                                                                                           | Sample Frequency | Precision/Accuracy*                                                                                 |
|-------------------------------------------------------------------------|--------------------------------------------------------------------------------------------------|------------------|-----------------------------------------------------------------------------------------------------|
| Position                                                                | GPS                                                                                              | 1 s              | Horizontal: ~1 / ±2.5 m<br>Vertical: ~1 / ±3.75 m                                                   |
| Meteorology (T, RH, P, 2-D Wind)                                        | Cloud water inertial probe (CWIP): Hotwire, advanced heading reference system, 5-hole gust probe | 1 s              | T: 0.2 / ±0.5 °C<br>P: 2.6 hPa / ±0.25% of FS<br>RH: 1 / ±2%<br>WS: 0.5 / ±1.0 m/s<br>WD: 5 / ±10 ° |
| Greenhouse gas<br>CO <sub>2</sub> /CH <sub>4</sub> /CO/H <sub>2</sub> O | Cavity Ring Down Spectroscopy<br>Picarro Model G2401-m                                           | 2 s              | CO <sub>2</sub> : 0.02 / ±0.1 ppm<br>CH <sub>4</sub> : 0.2 / ±1 ppb<br>CO: 4.2 / ±10 ppb            |
| Ozone (O <sub>3</sub> )                                                 | UV Absorption                                                                                    | 10 s             | 1 ppb / ±1%                                                                                         |
| Sulfur Dioxide (SO <sub>2</sub> )                                       | Pulsed Fluorescence                                                                              | 10 s             | 0.1 ppb / ±3%                                                                                       |
| Nitrogen Dioxide (NO <sub>2</sub> )                                     | Cavity enhanced absorption spectroscopy, Los Gatos                                               | 1 s              | 0.05 ppb / ±5%                                                                                      |
| Reactive Nitrogen (NO-NO <sub>y</sub> )                                 | Chemiluminescence                                                                                | 10 s             | 0.05 ppb / ±3%                                                                                      |
| Aerosol Scattering, b <sub>scat</sub><br>(450, 550, 700 nm)             | Nephelometer                                                                                     | 1 s              | ±5x10 <sup>-7</sup> m <sup>-1</sup> / ±5%                                                           |
| Aerosol Absorption, b <sub>abs</sub><br>(565 nm)                        | Particle Soot Absorption Photometer (PSAP)                                                       | 1 min            | ±5x10 <sup>-7</sup> m <sup>-1</sup> / ±5%                                                           |
| Black Carbon (370, 470, 520, 590, 660, 880, 950 nm)                     | Aethalometer                                                                                     | 2 min            | 0.05 µg/m <sup>3</sup> / ±5%                                                                        |
| VOCs                                                                    | Grab Canisters/GC-FID                                                                            | 5-6 / flight     | Species dependent                                                                                   |
| Formaldehyde                                                            | Wet chemistry and fluorescence detection                                                         | 90 seconds       | 0.1 ppb / ±5%                                                                                       |

\*The precisions are from the instrument specifications provided by the manufacturers while the accuracies are estimated from the uncertainties in calibration standards and mass flow controllers that are used to control flow rates of zero air and calibration gas.

**Figure S1.** ARIAs flights over the NCP and the WRF-CMAQ domains. Eleven Research Flights were conducted in May to Mid-June 2016.

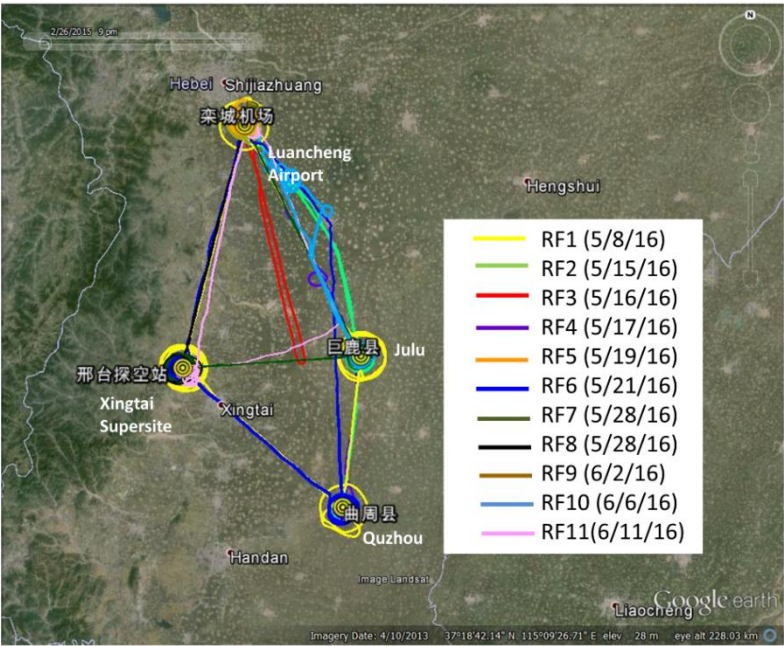

**Figure S2.** A plume observed over Xingtai during the flight on June 11, 2016. The height of mixing layer is around 1500 m AGL. Secondary peaks  $\text{NO}_2$  at 500 m AGL and CO at 1500 m AGL were observed.

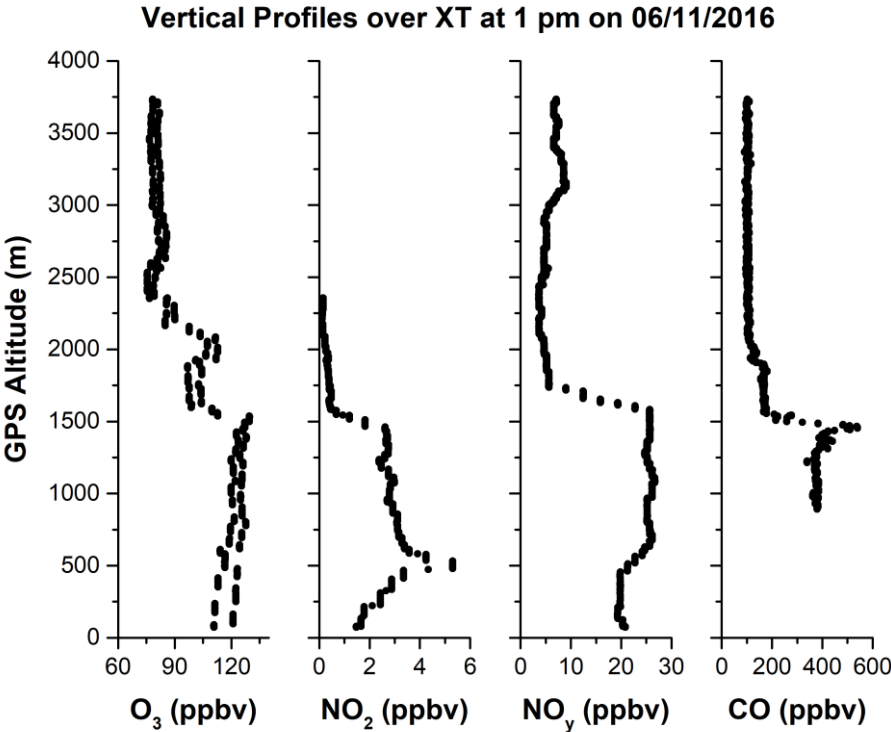

**Figure S3.** Comparison of surface hourly observations of air pollutants and CMAQ simulations at the Xingtai supersite from May to mid-June 2016. a) O<sub>3</sub>, b) CO, c) NO<sub>2</sub><sup>\*</sup>, d) NO<sub>x</sub> and e) HCHO. \*Surface NO<sub>2</sub> is inferred as NO<sub>x</sub>-NO from surface observations.

a)

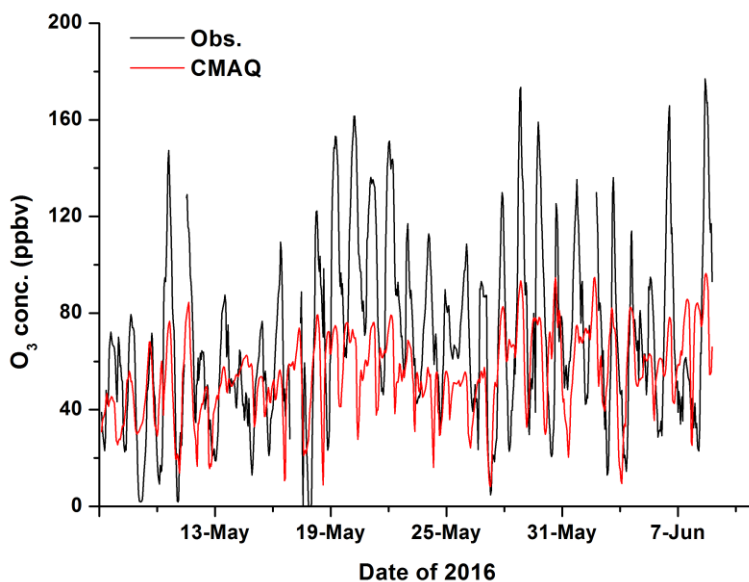

b)

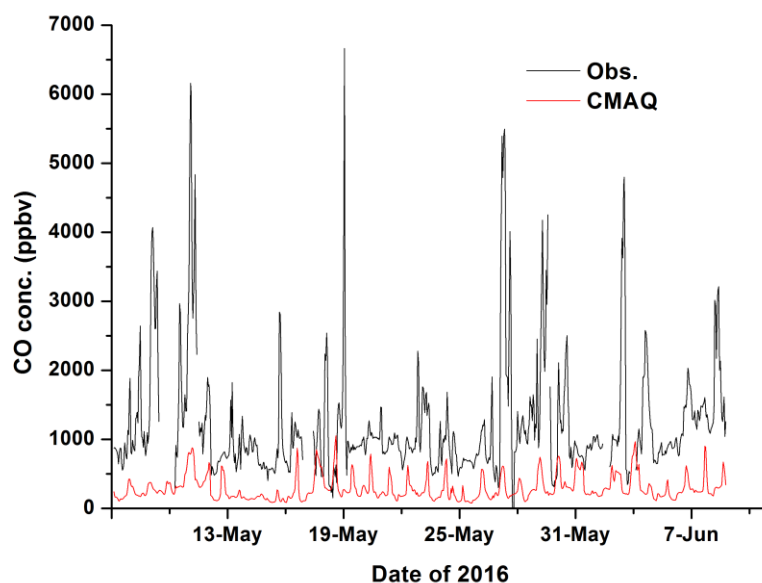

56 c)

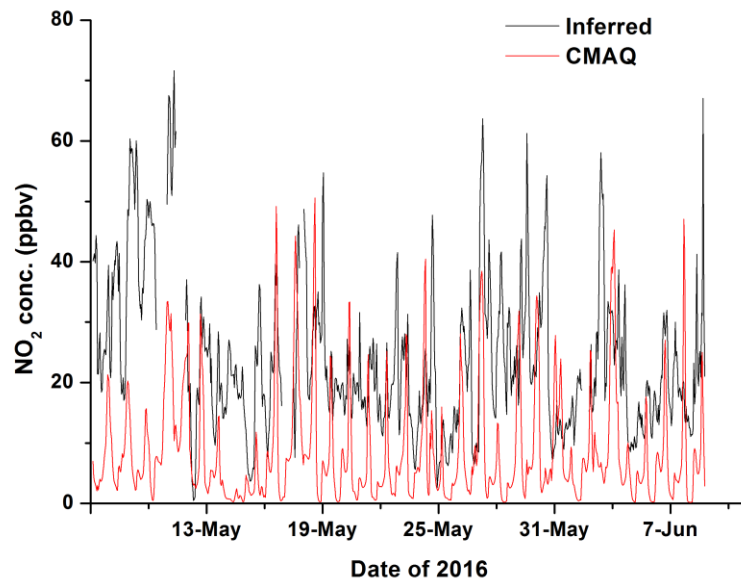

57  
58 d)

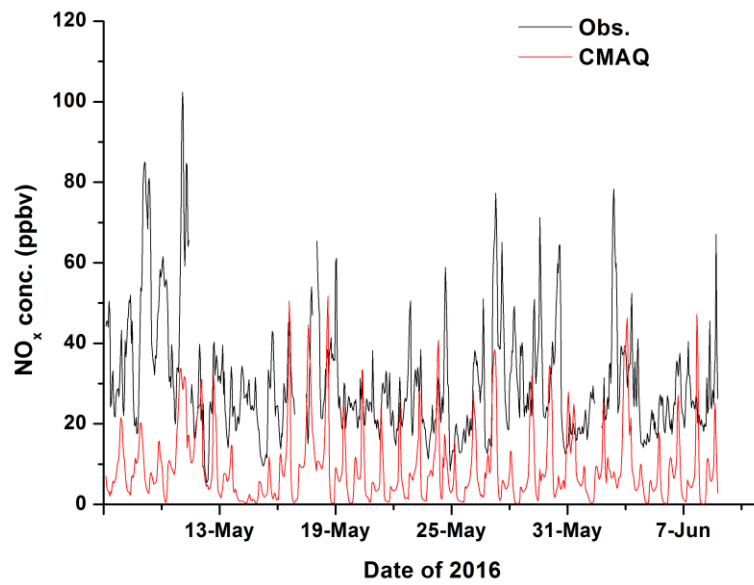

59

60 e)

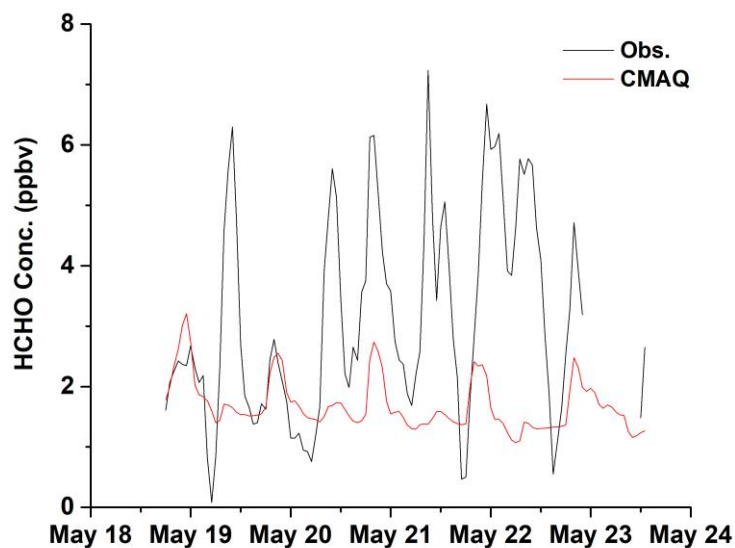

**Figure S4.** Terrain map of the Xingtai supersite (Picture obtained from Google Earth). The supersite is located on a small hill surrounded by mountains to the west. The Xingtai city (with ~ 1 million population) is located ~15 km southeast of the supersite.

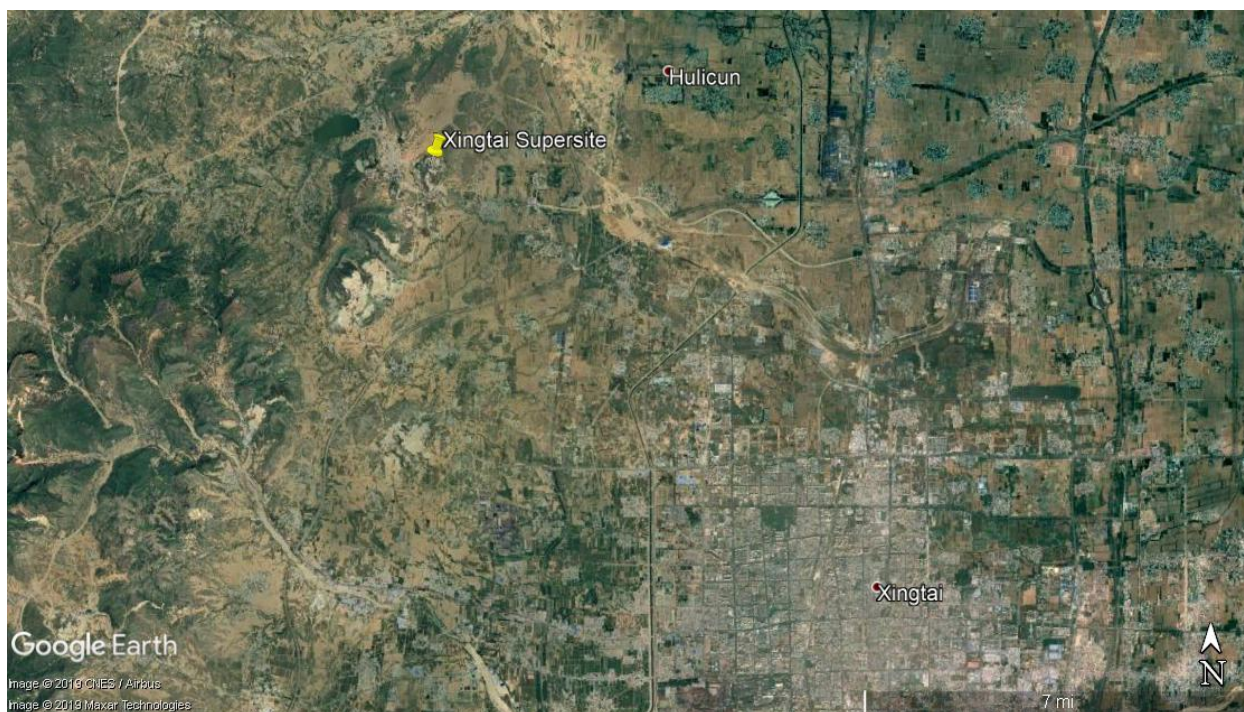



**Figure S5.** A case study comparing aircraft observations and the baseline CMAQ modeling results on June 11, 2016. Background: CMAQ simulations. Overlay: 1-min Y12 measurements. a) O<sub>3</sub>, b) NO<sub>2</sub>, c) NO, d) NO<sub>y</sub>, e) CO.

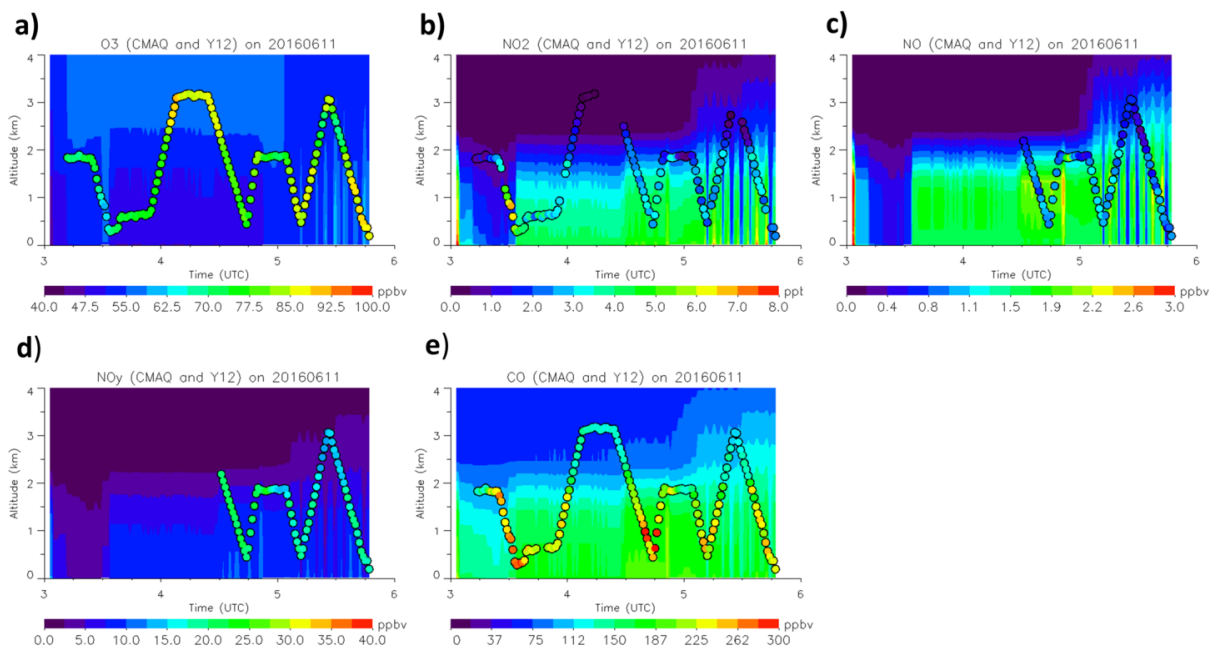

**Figure S6.** Ratios of column contents of the baseline CMAQ simulations and satellite observations. a) CMAQ/OMI NO<sub>2</sub>; b) CMAQ/OMI HCHO; c) CMAQ/MOPITT CO.

a)

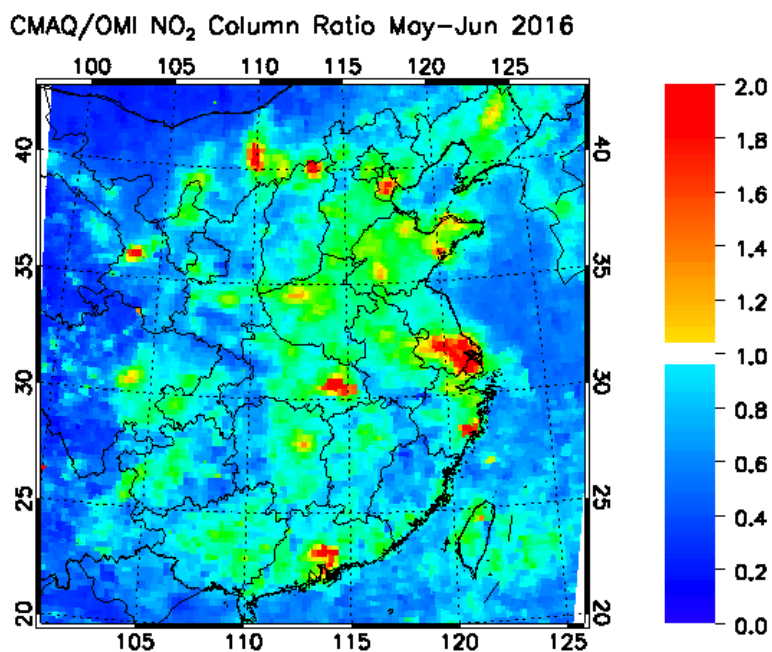

77 b)

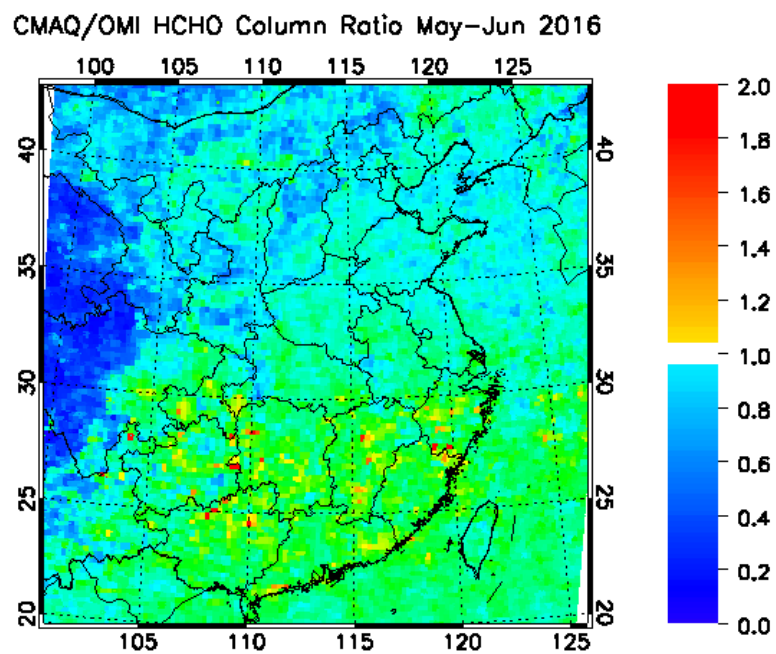

78

79 c)

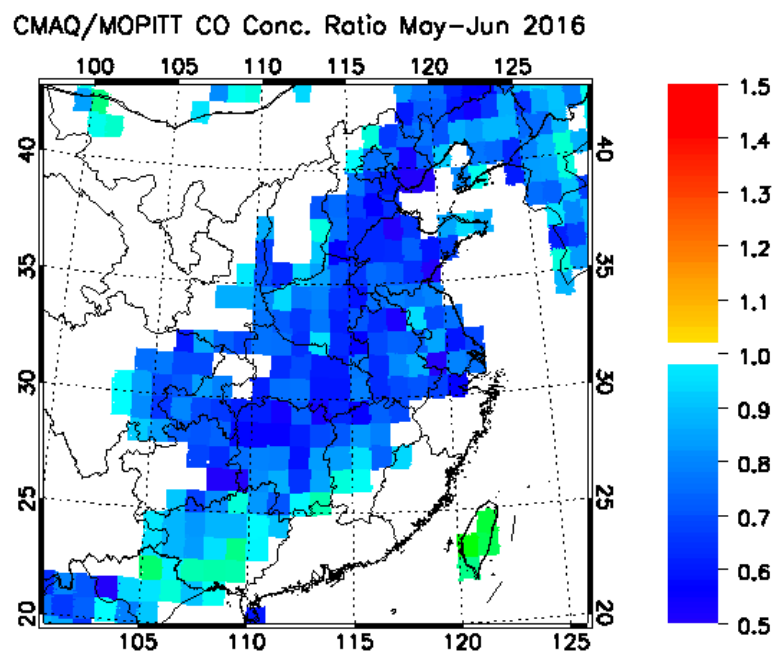

80

81



**Figure S7.** Similar as Figure 7, but shows differences between satellite observations and CMAQ simulations in May and June 2016. a) difference of NO<sub>2</sub> column between OMI and CMAQ; b) difference of HCHO column between OMI and CMAQ; c) difference of near surface CO between MOPITT and CMAQ.

a)

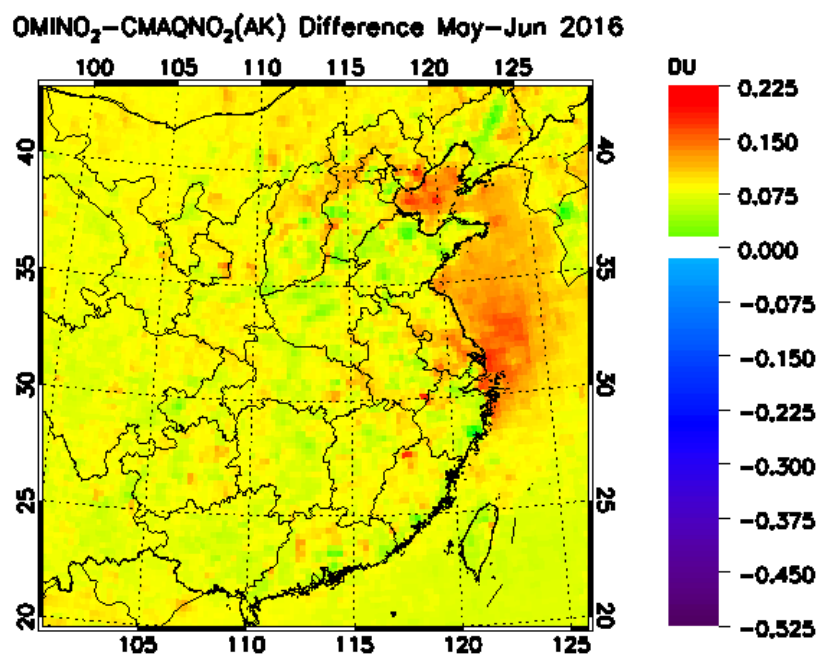

b)

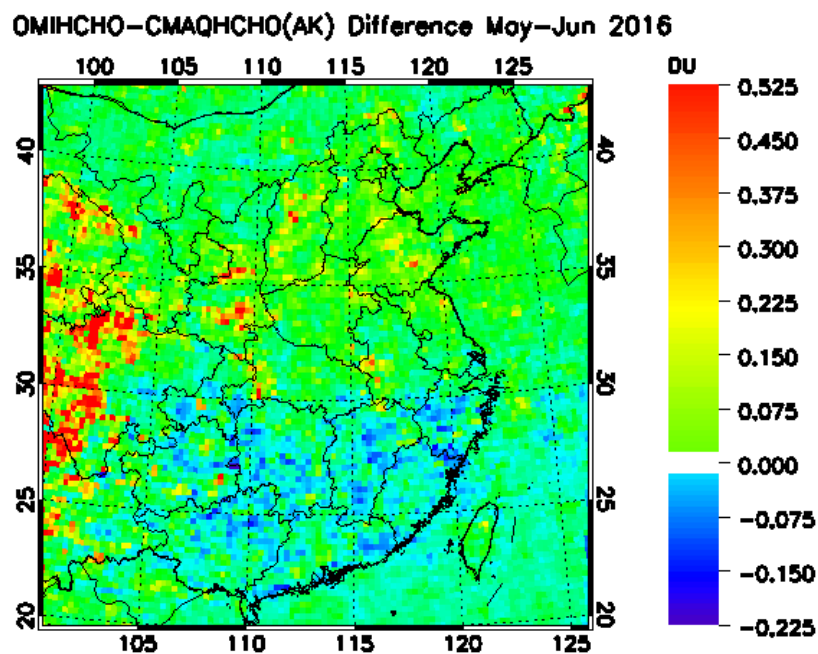

91 c)

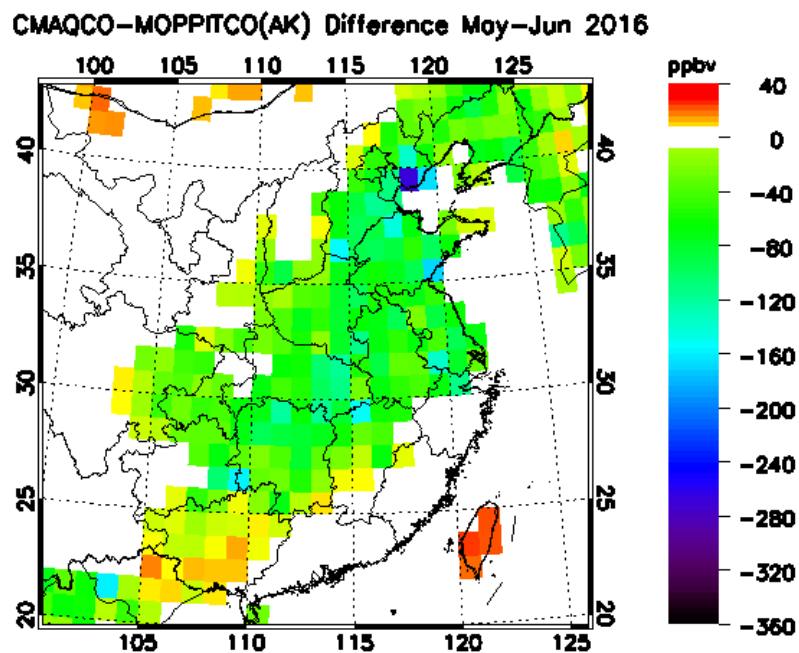

92  
93  
94 **Figure S8.** Similar as Figure 10, but shows differences between CMAQ\_baseline and  
95 CMAQ\_all runs with respect to surface observations. a) O<sub>3</sub>, b) CO, c) NO<sub>2</sub>, d) NO<sub>x</sub>, e) HCHO  
96 a)

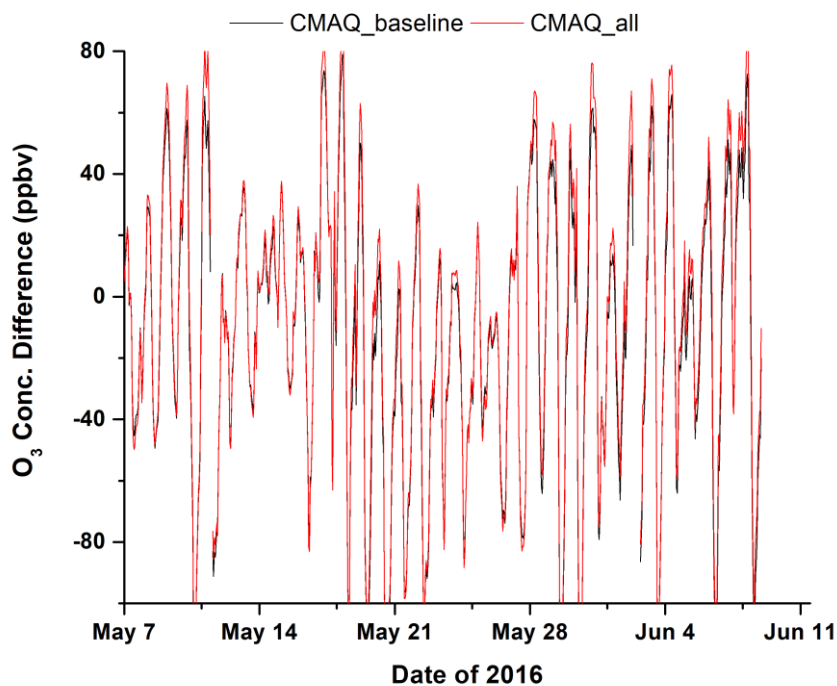

97  
98

99    b)

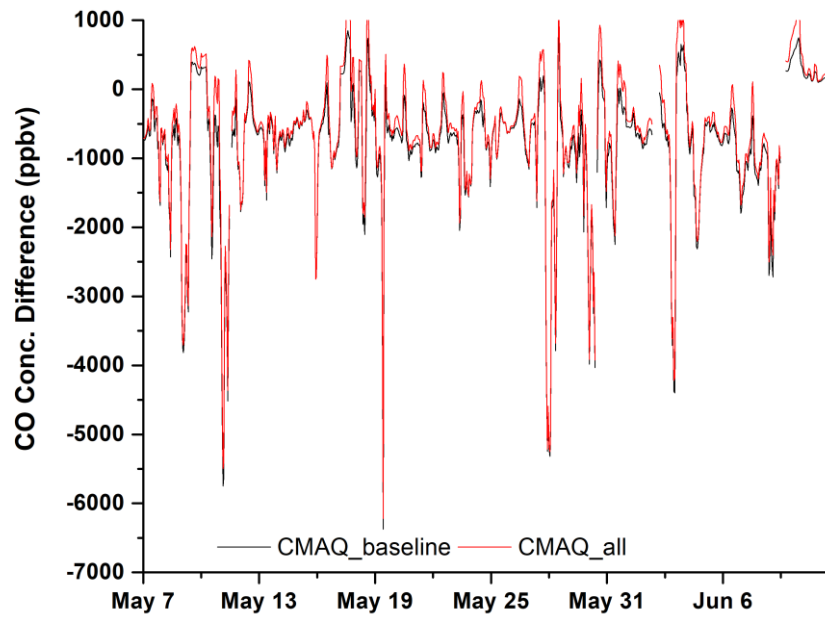

100  
101    c)

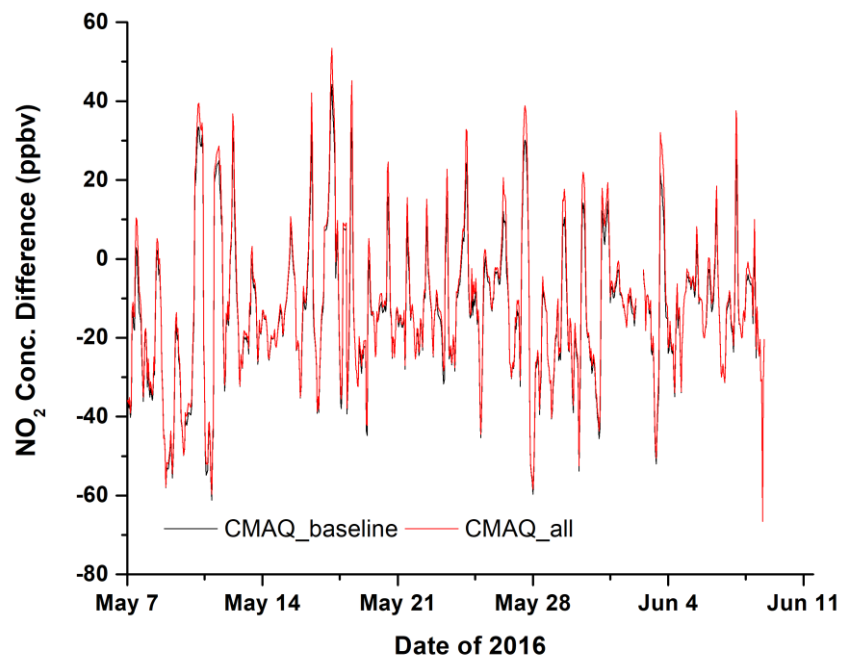

102  
103

104 d)

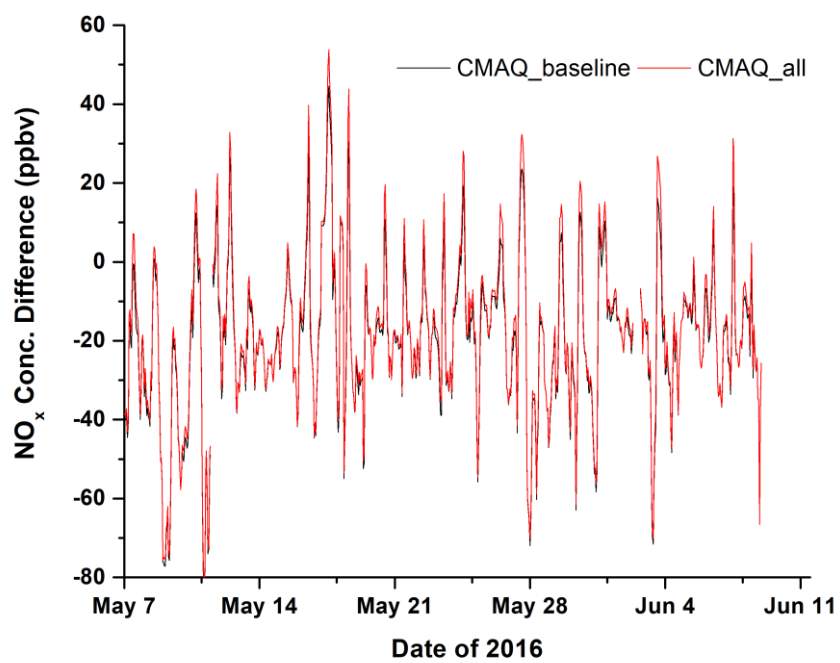

105  
106 e)

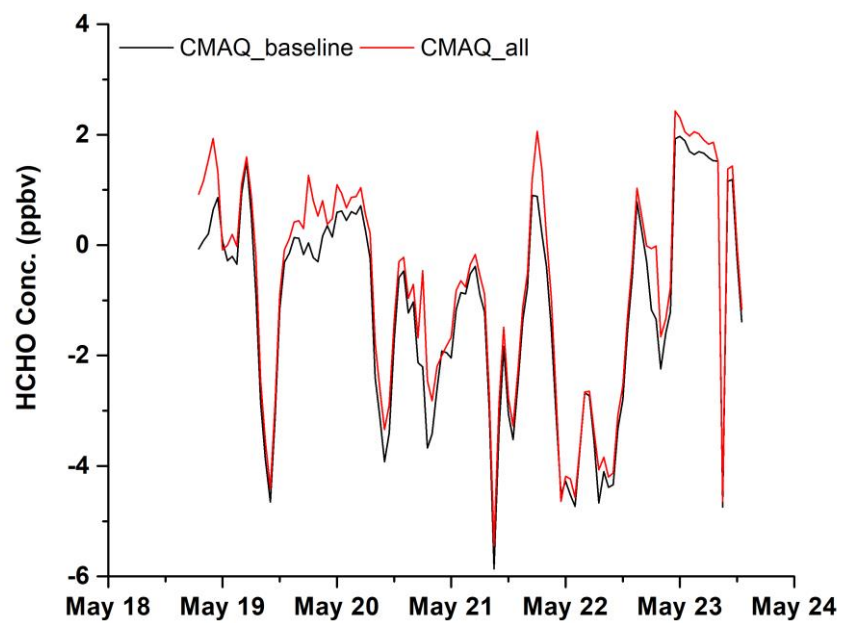

107  
108

**Figure S9.** Similar as Figure S3, but shows concentrations of air pollutants from all 6 CMAQ simulations.

a)

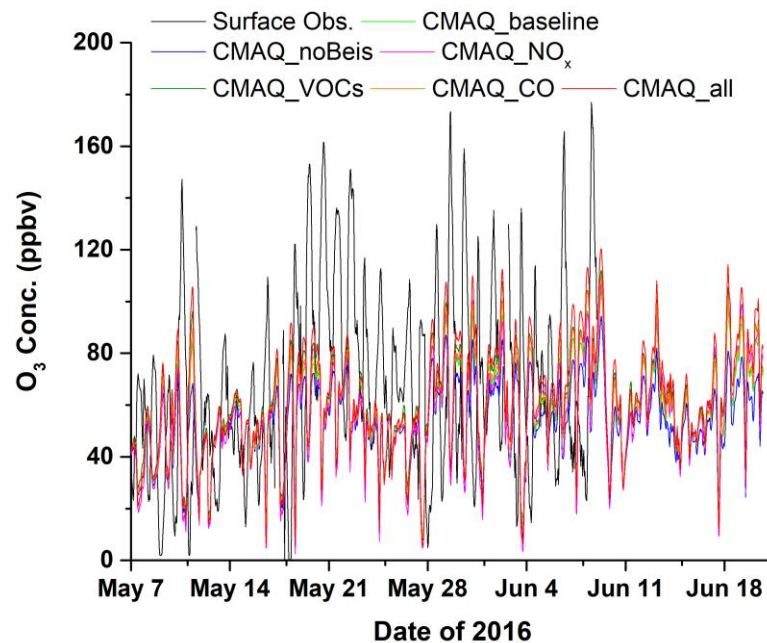

b)

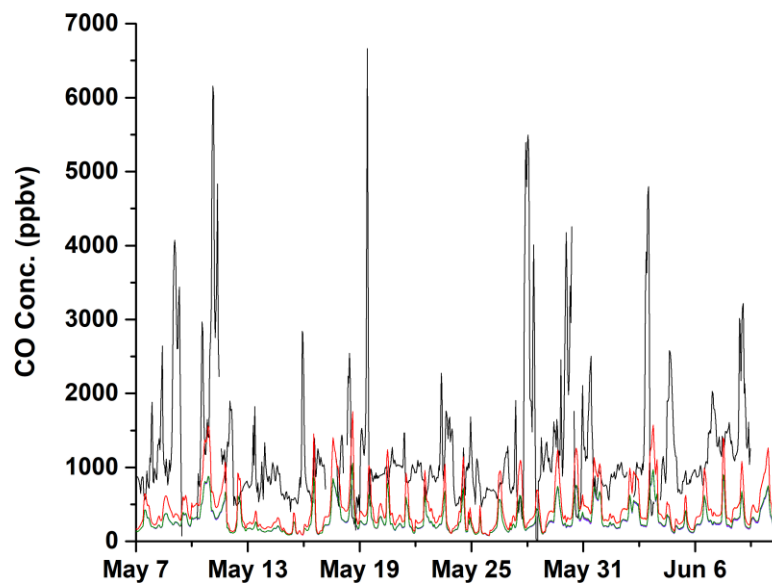

115 c)

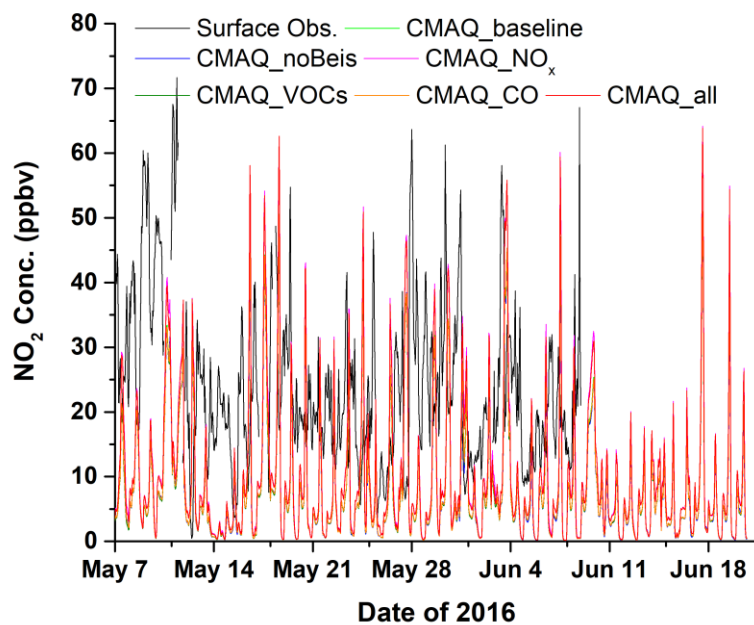

116  
117 d)

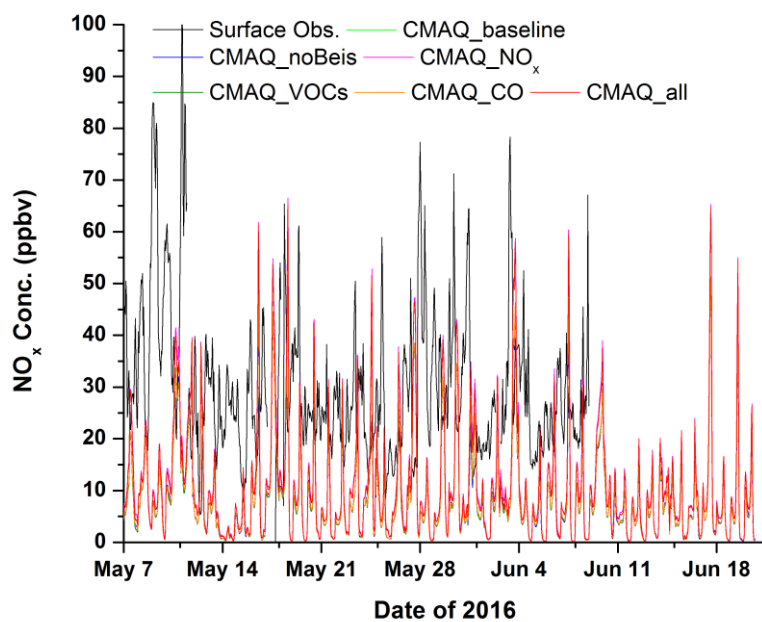

118



119 e)

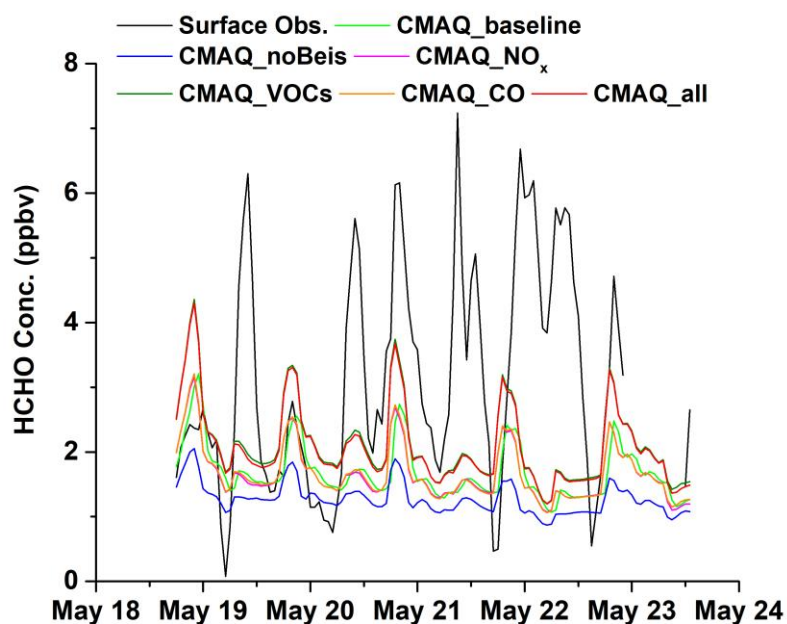

120 **Figure S10.** Similar as Figure 4, but shows results from other CMAQ sensitivity experiments.  
 121  
 122 a) CMAQ\_noBEIS

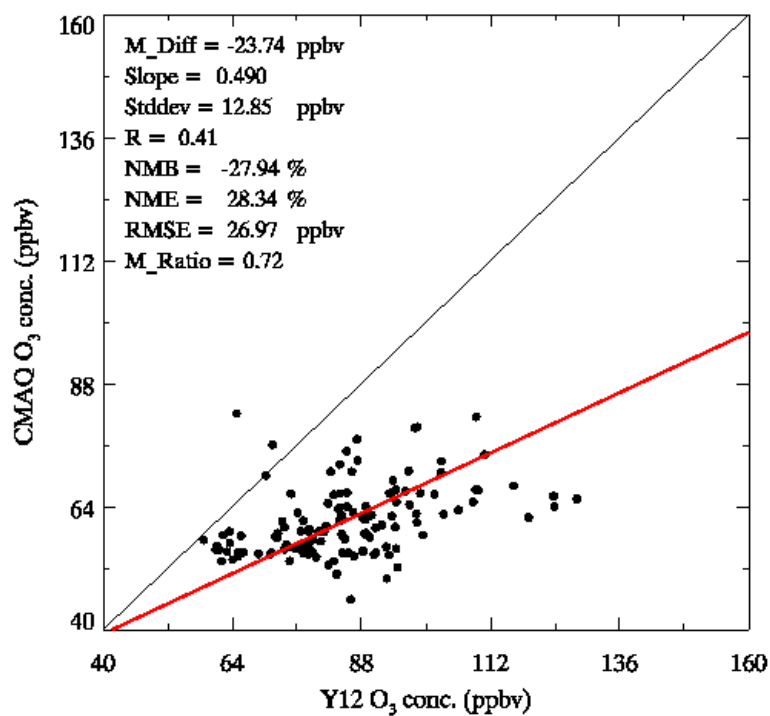

123

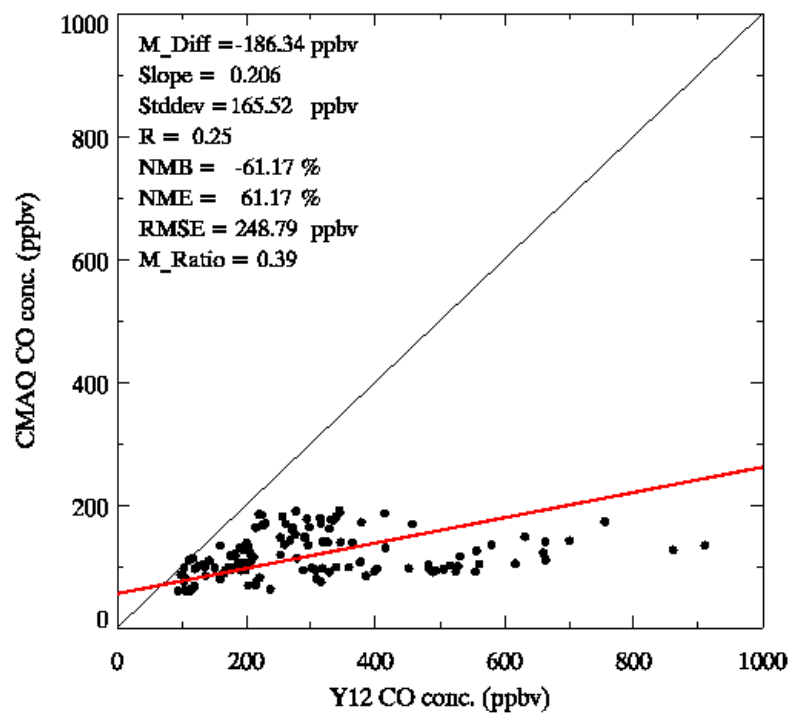

124

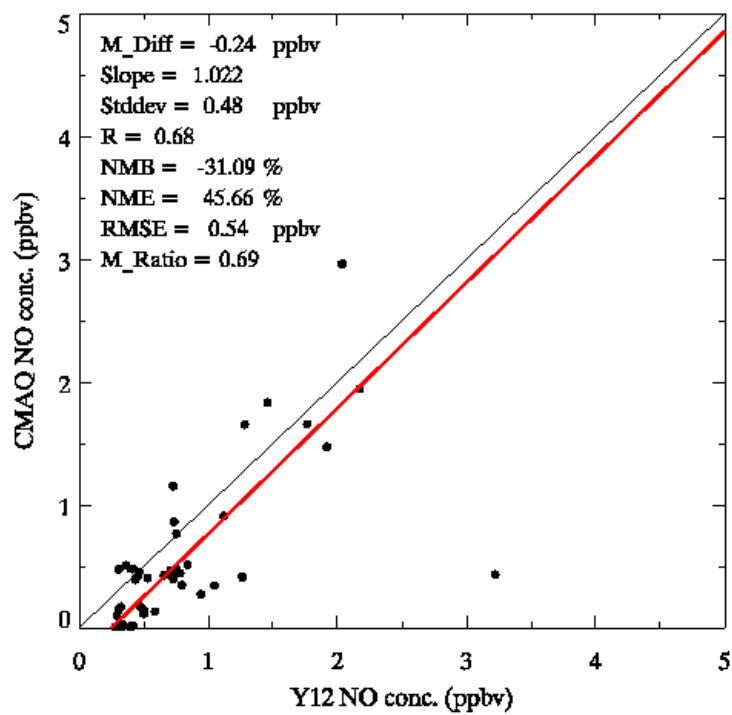

125

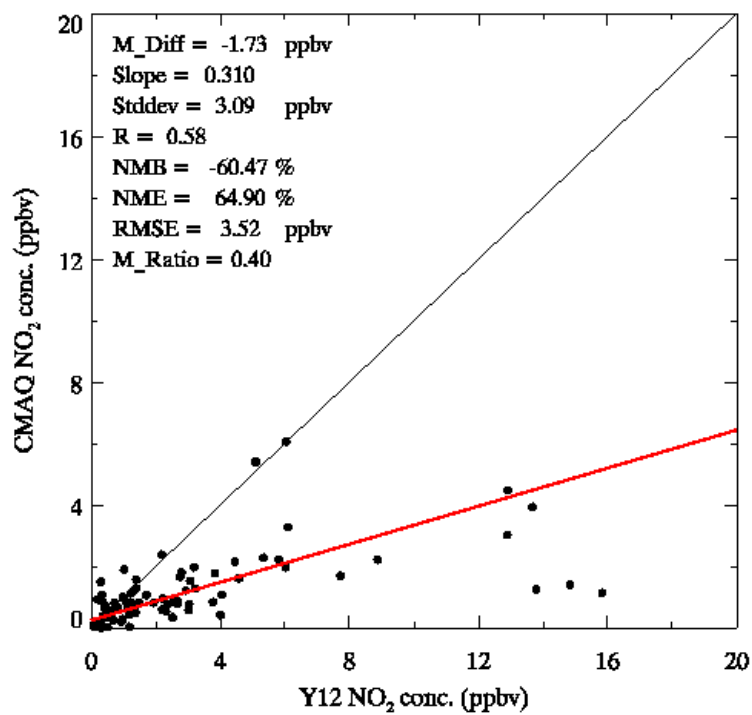

126  
127 b) CMAQ\_NOx

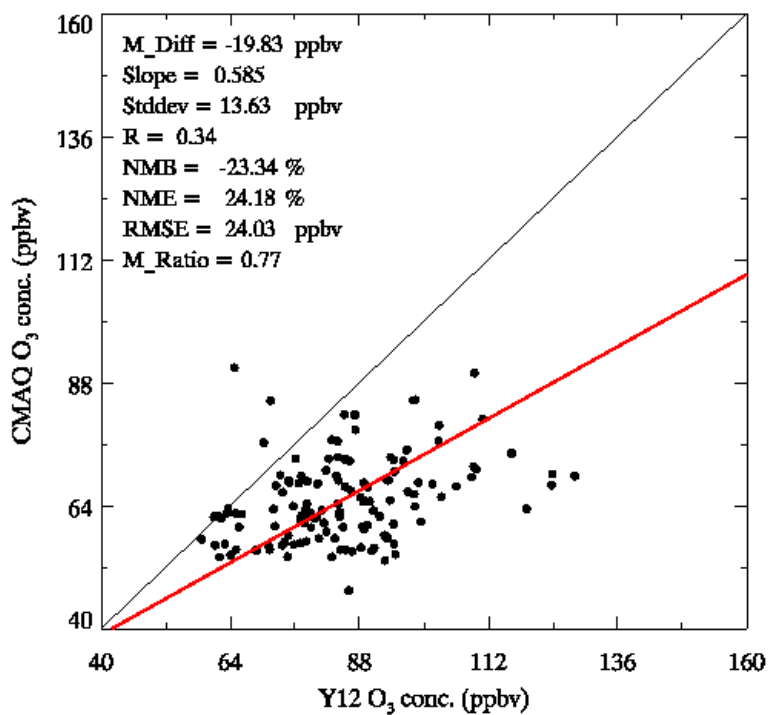

128

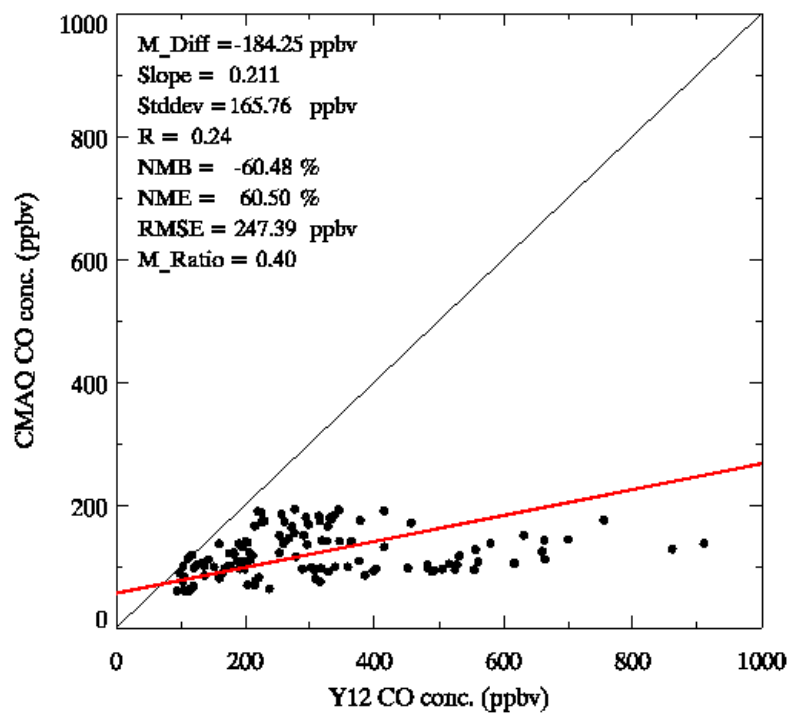

129

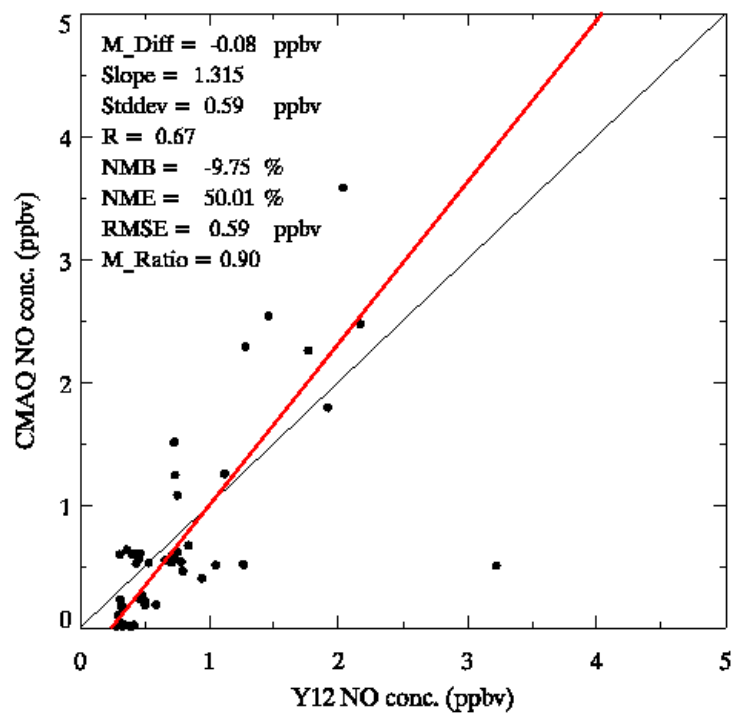

130

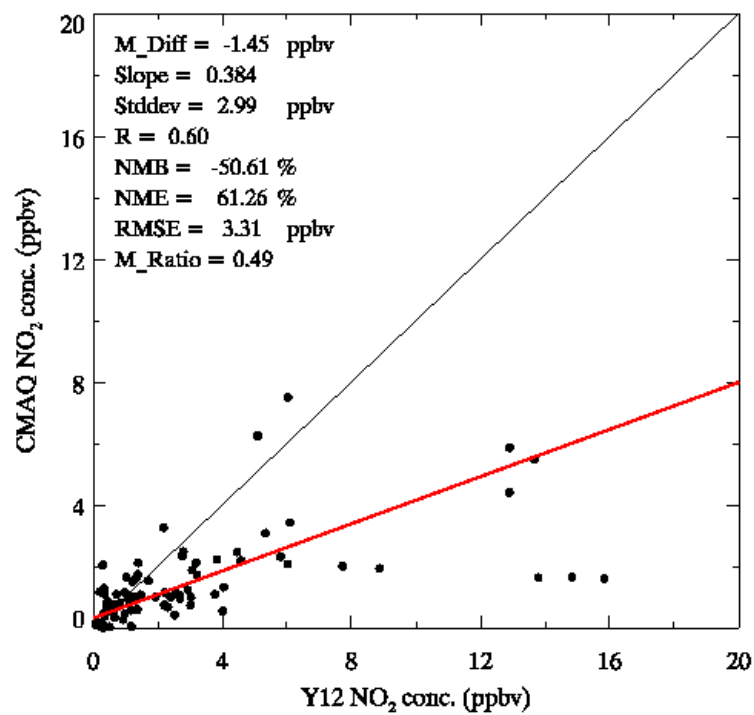

131  
132 c) CMAQ\_VOCs

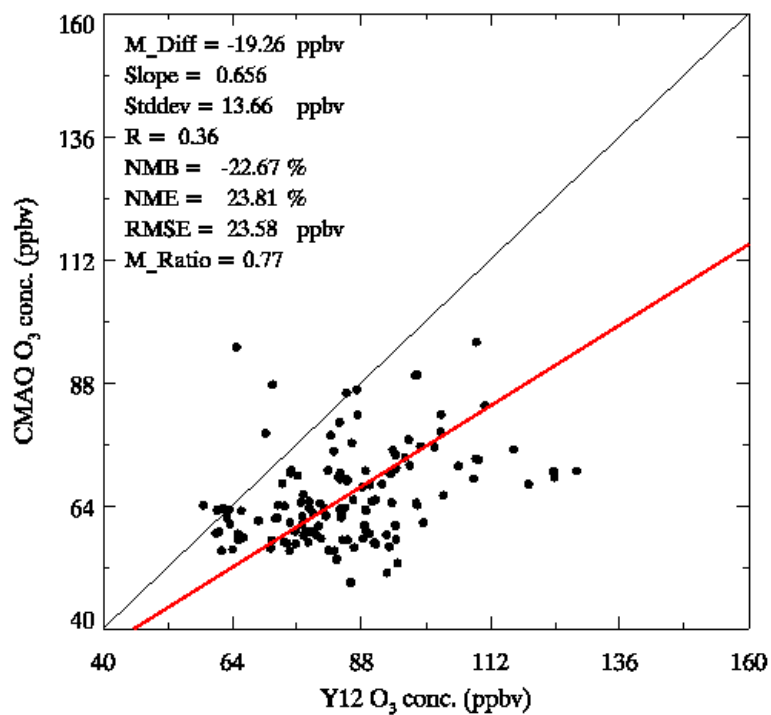

133

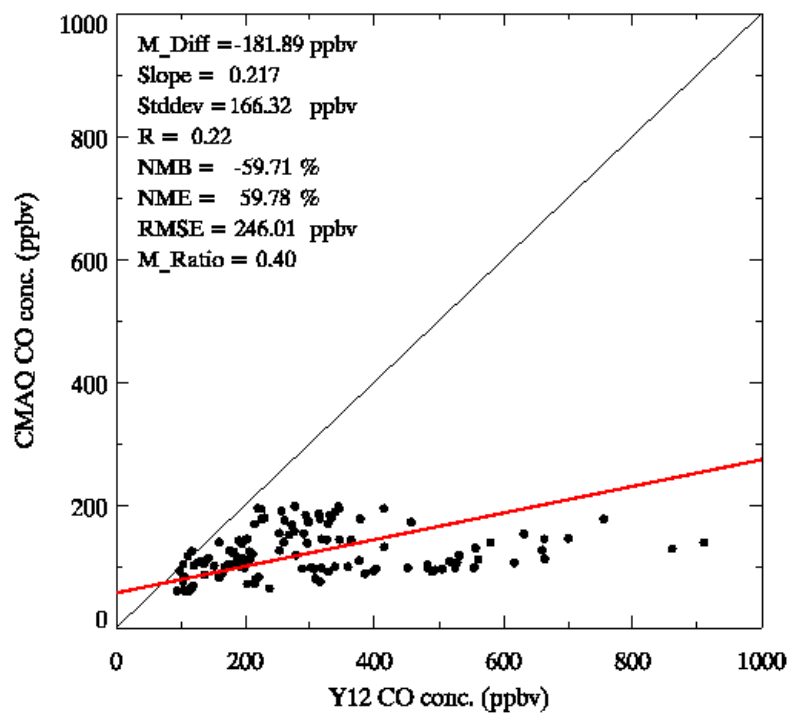

134

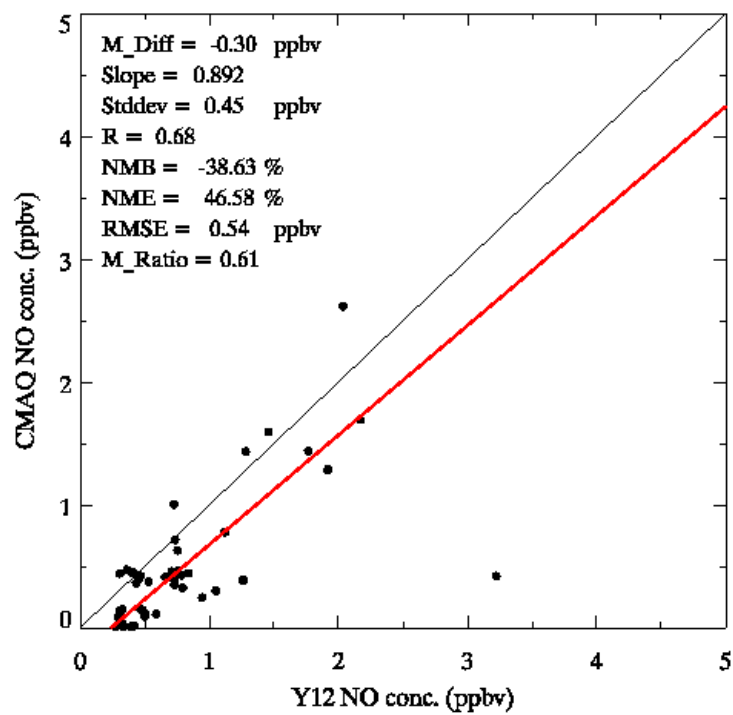

135



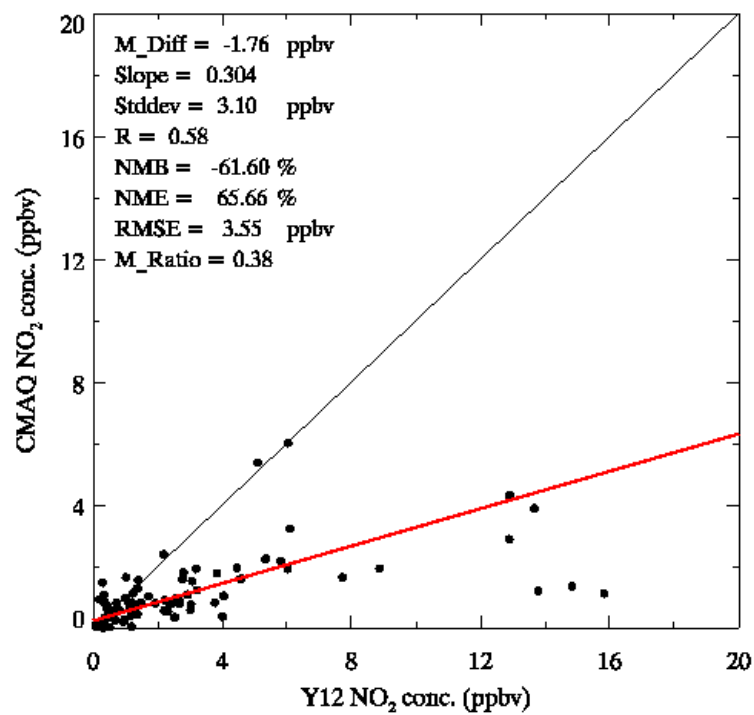

d) CMAQ\_CO

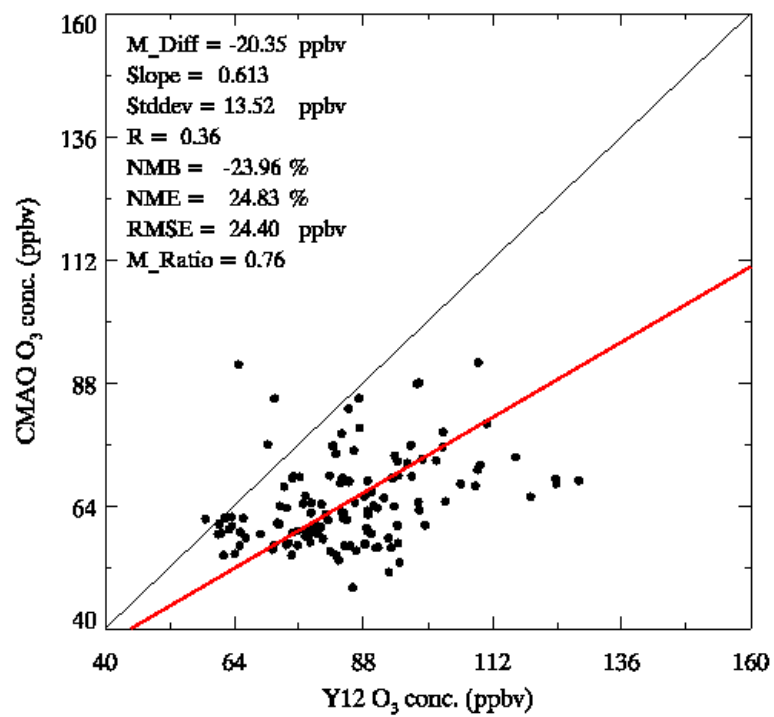

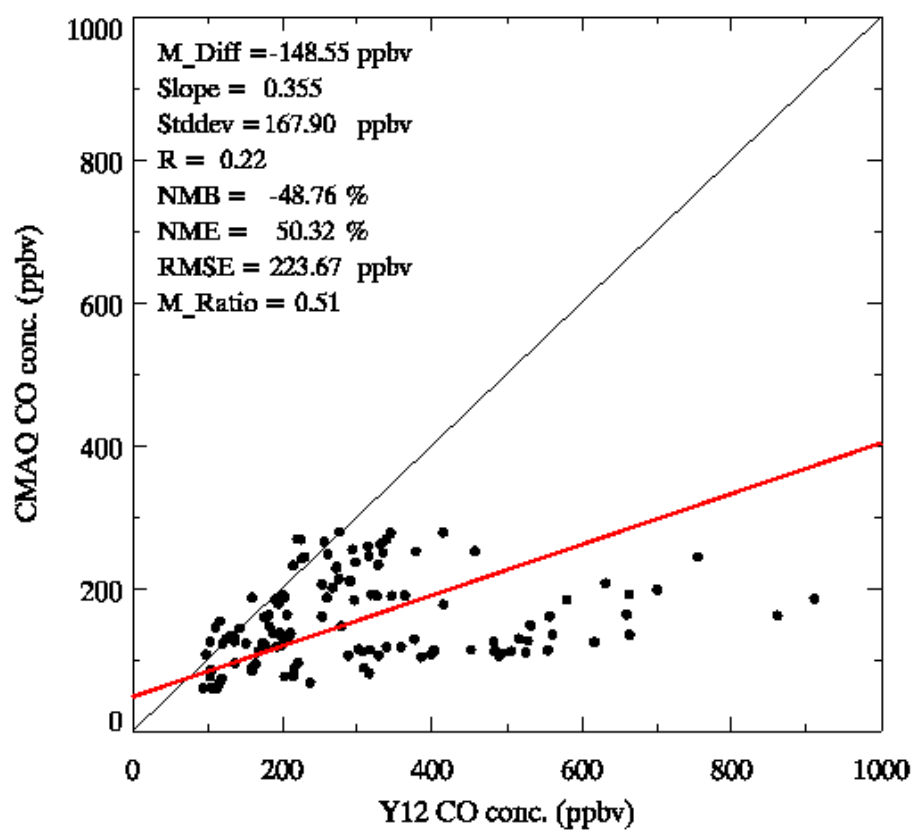

140

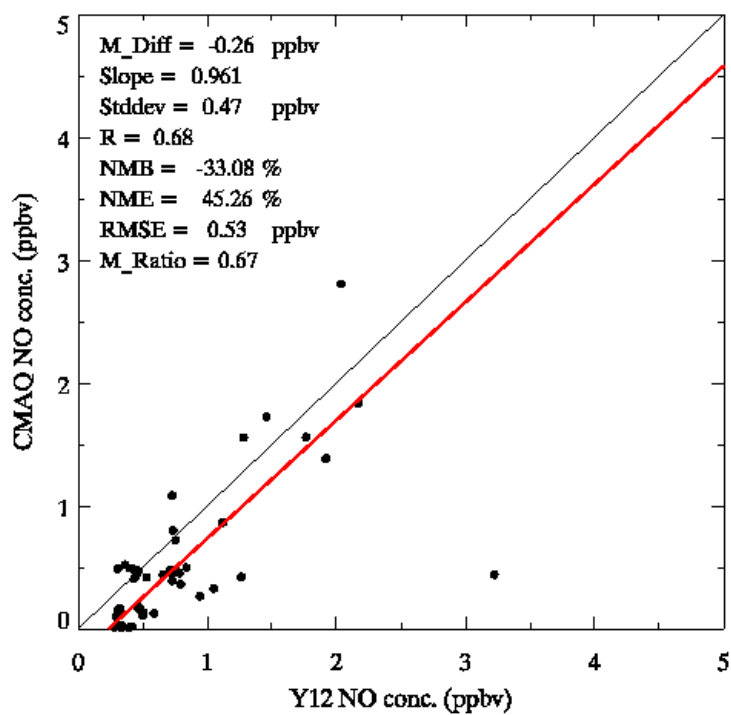

141

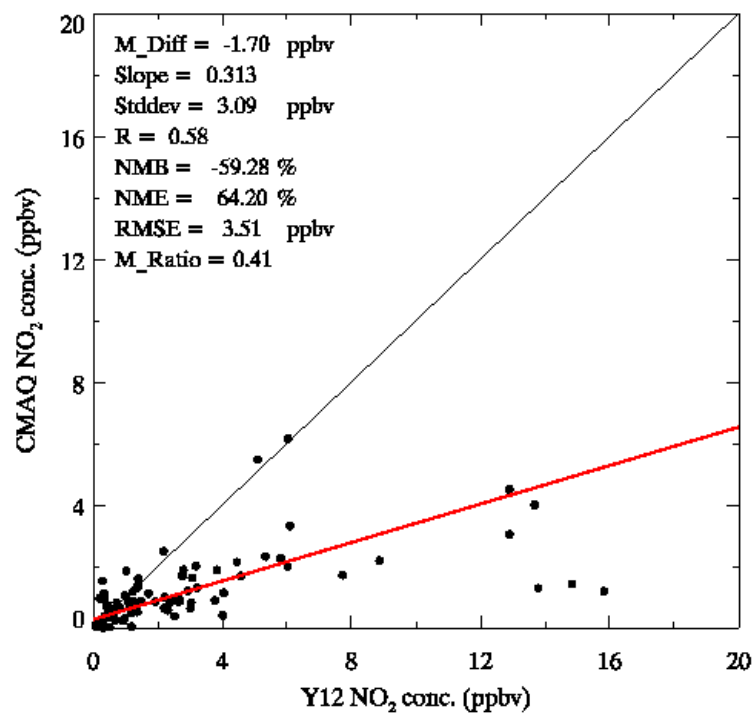

e) CMAQ\_all

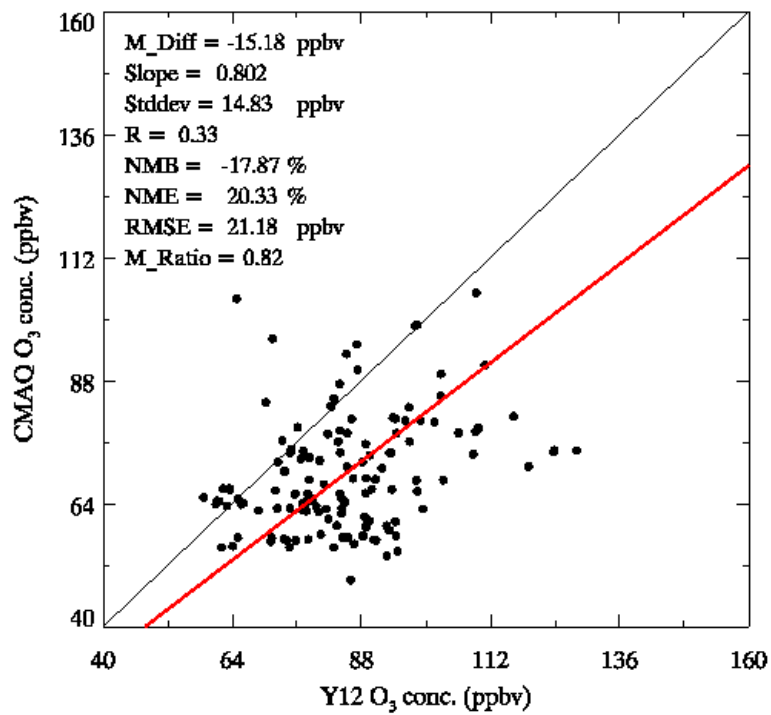

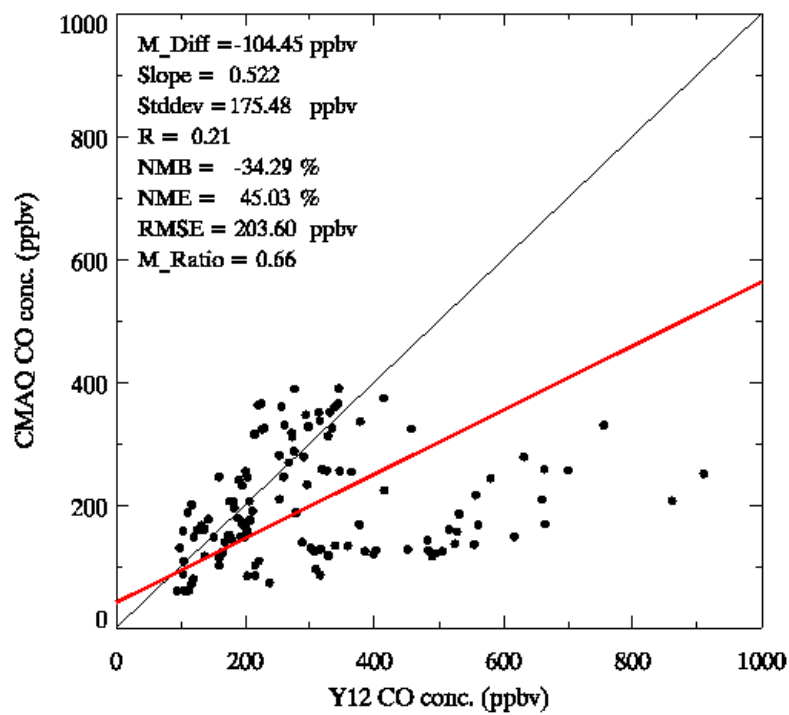

146

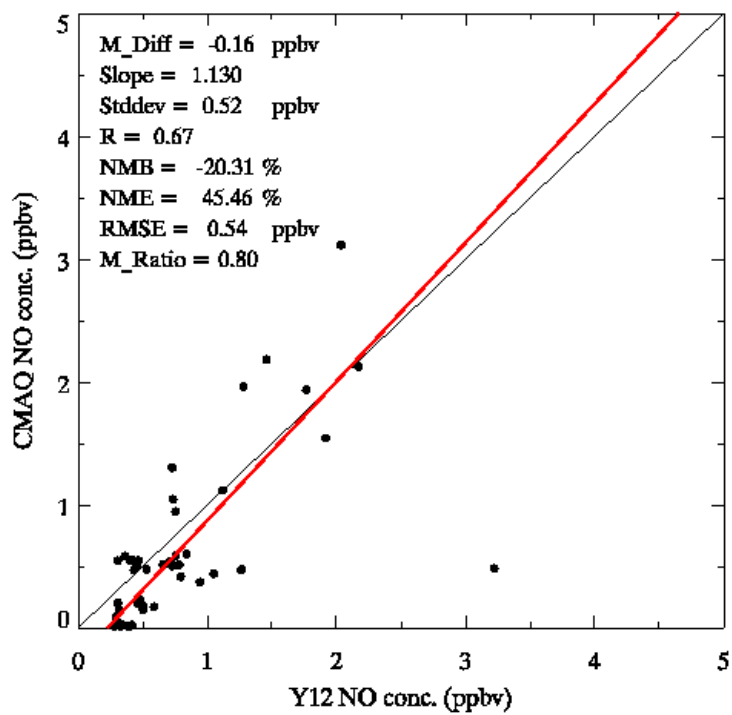

147

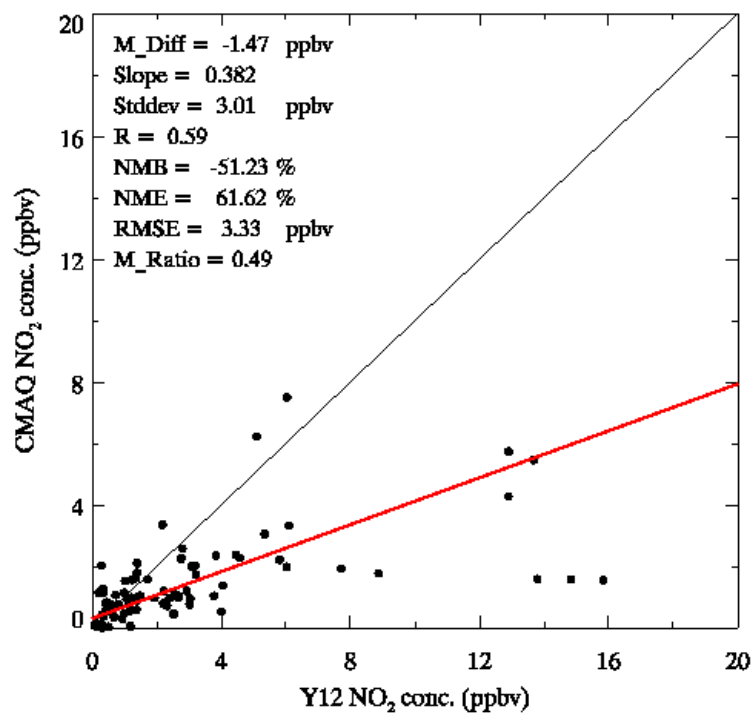

Supplement: Supplementary file [file acp-2019-248-AC1-supplement.zip]
