# Supplementary material for: Evaluation of Anthropogenic Emissions and Ozone Pollution in the North China Plain: Insights from the Air Chemistry Research in Asia (ARIAs) Campaign
Source: Copernicus journal article supplement (doi:10.5194/acp-2019-248), 2019-03-29
Supplement: Supplementary file 1 [file acp-2019-248-supplement.pdf]

## Supplementary Material

**Figure S1.** Comparison of surface hourly observations of air pollutants and CMAQ simulations at the Xingtai supersite from May to mid-June 2016. a) O<sub>3</sub>, b) CO, c) NO<sub>2</sub><sup>\*</sup>, d) NO<sub>x</sub> and e) HCHO. <sup>\*</sup>Surface NO<sub>2</sub> is inferred as NO<sub>x</sub>-NO from surface observations.

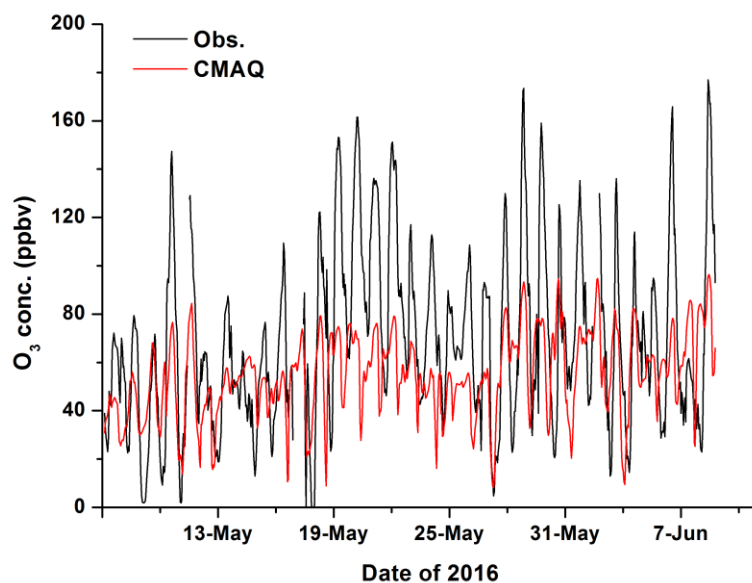

b)

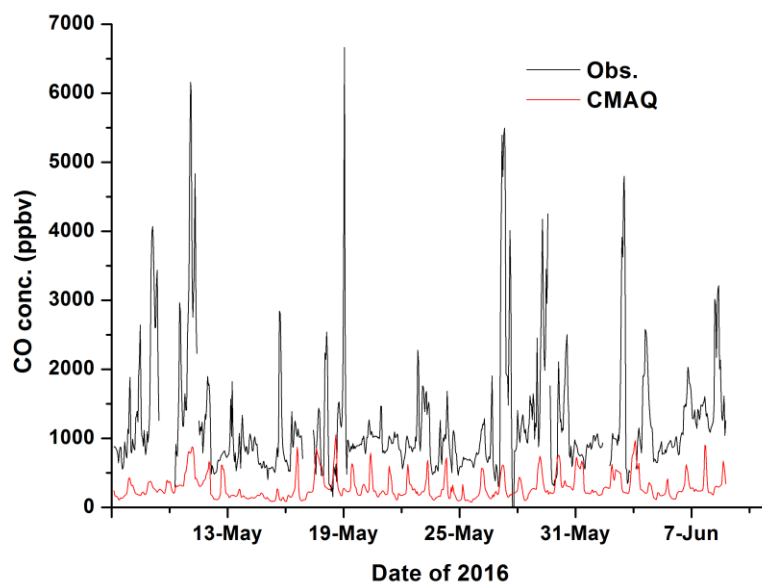

10 c)

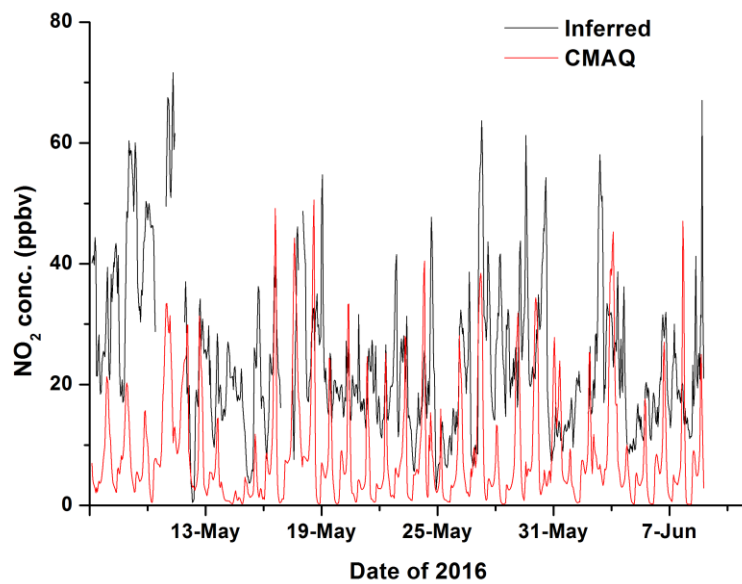

11  
12 d)

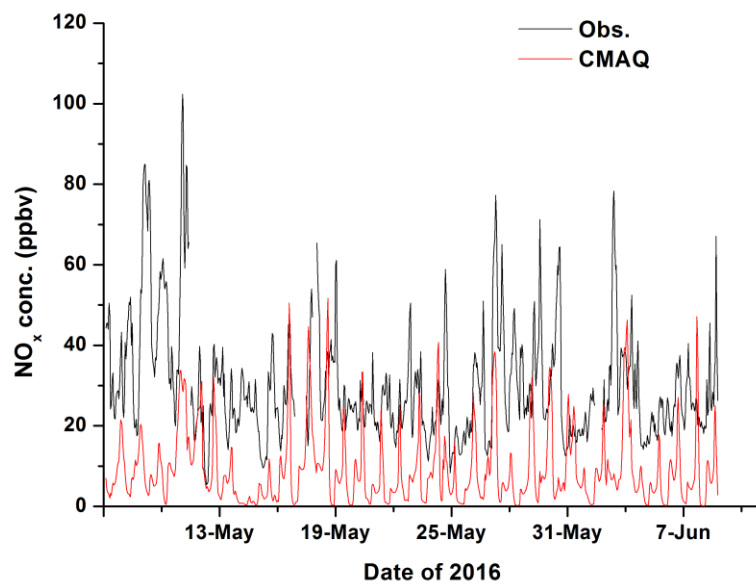

13

14 e)

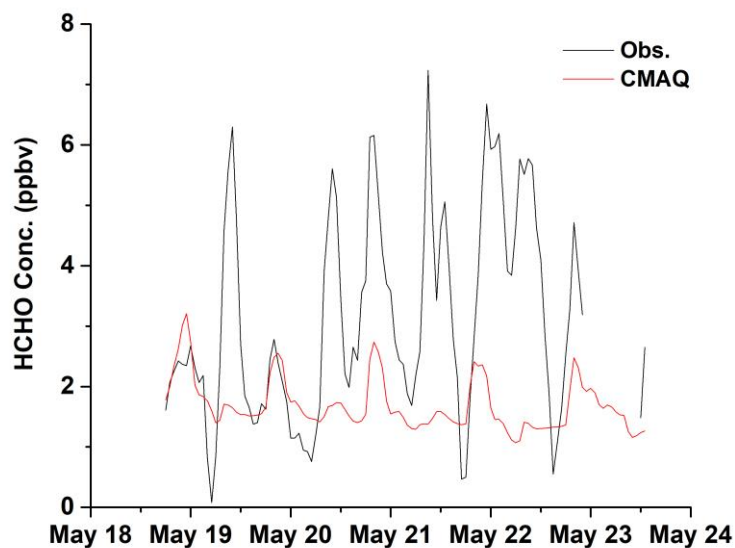

15  
16 **Figure S2.** A case study comparing aircraft observations and the baseline CMAQ modeling  
17 results on June 11, 2016. Background: CMAQ simulations. Overlay: 1 min Y12 measurements.  
18 a) O<sub>3</sub>, b) NO<sub>2</sub>, c) NO, d) NO<sub>y</sub>, e) CO.

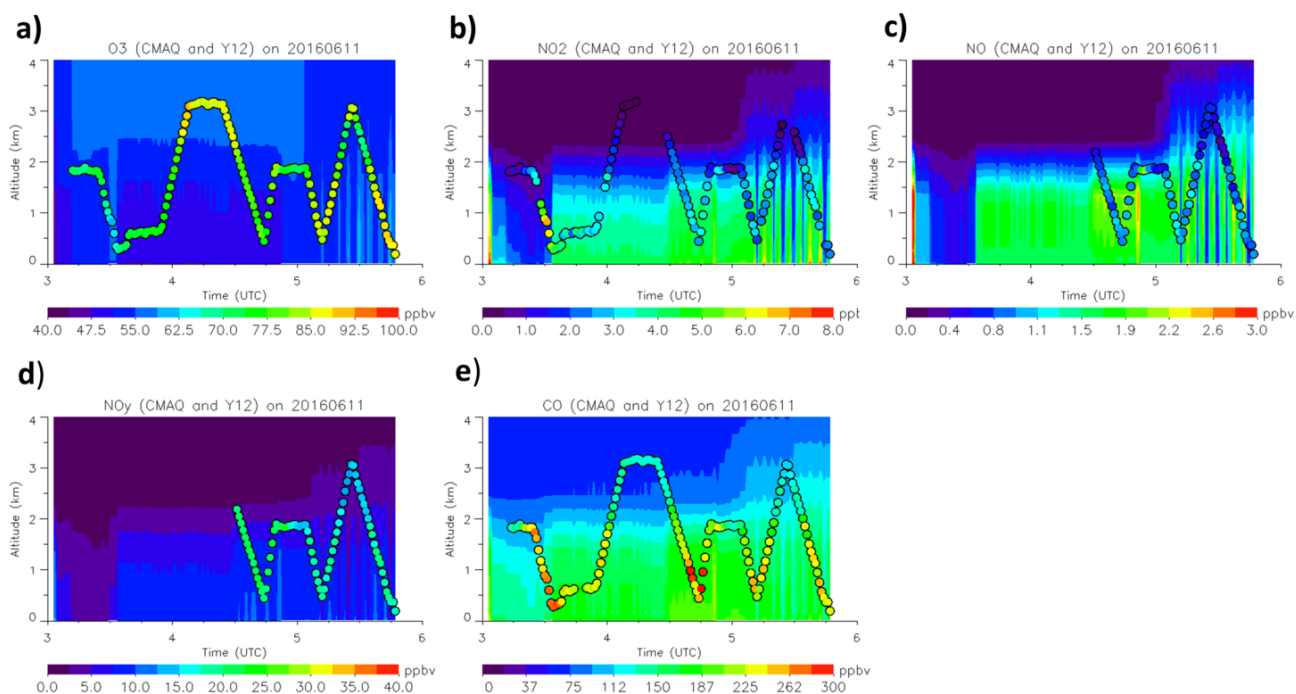

19  
20

**Figure S3.** Comparison of surface hourly observations of air pollutants and six CMAQ simulations at the Xingtai supersite from May to mid-June 2016. a) O<sub>3</sub>, b) CO, c) NO<sub>2</sub>\*, d) NO<sub>x</sub>, and e) HCHO. \*Surface NO<sub>2</sub> is inferred as NO<sub>x</sub>-NO from surface observations.

a)

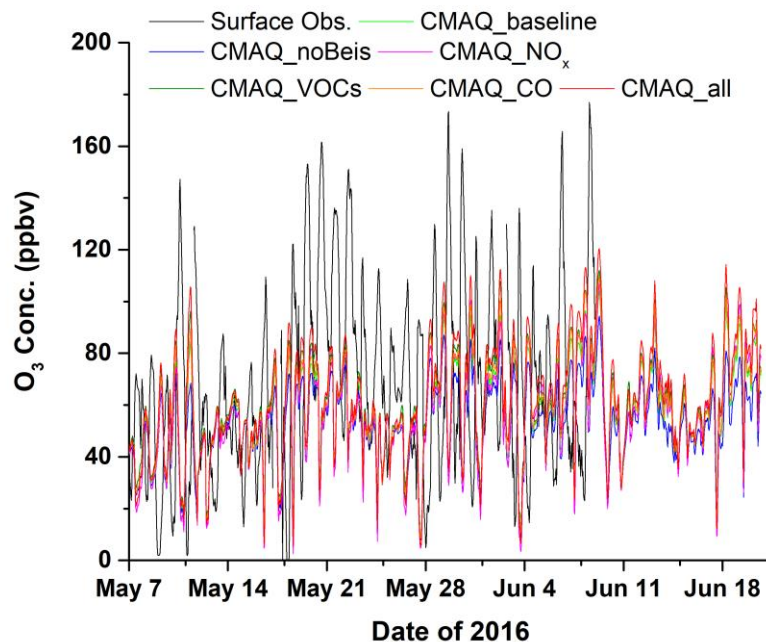

b)

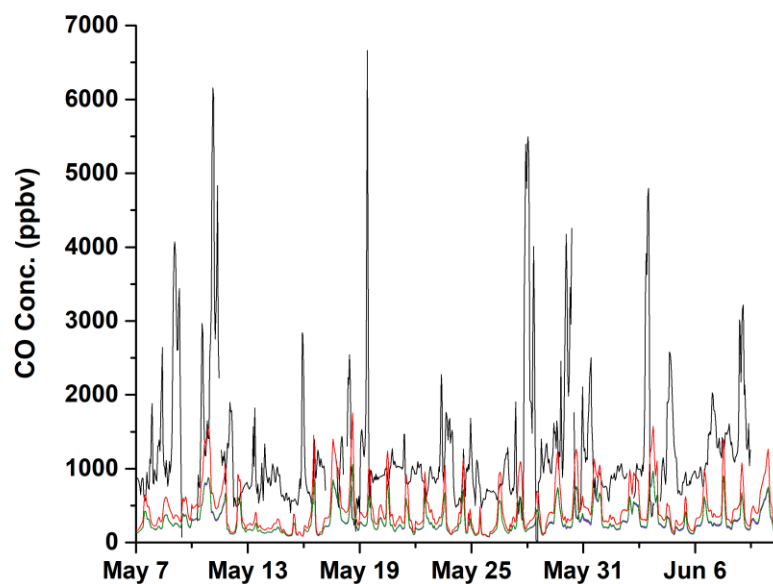

28 c)

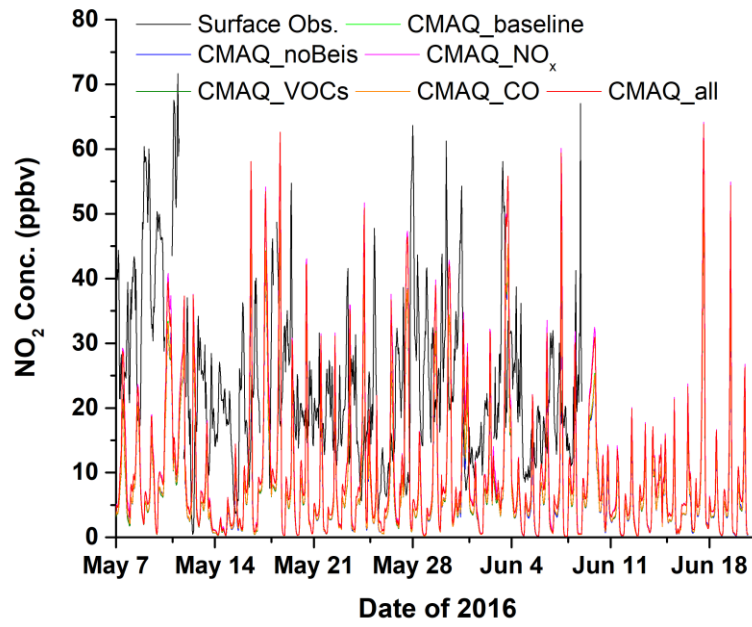

29  
30 d)

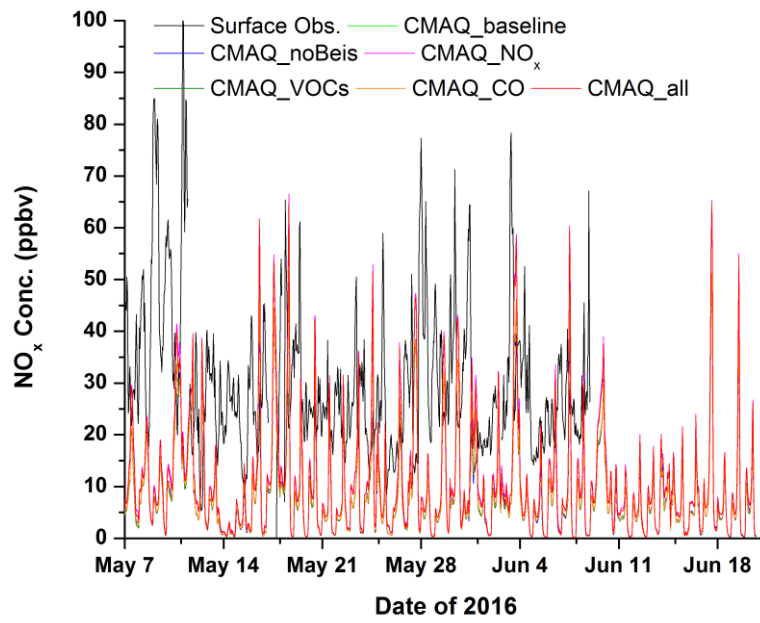

31

32 e)

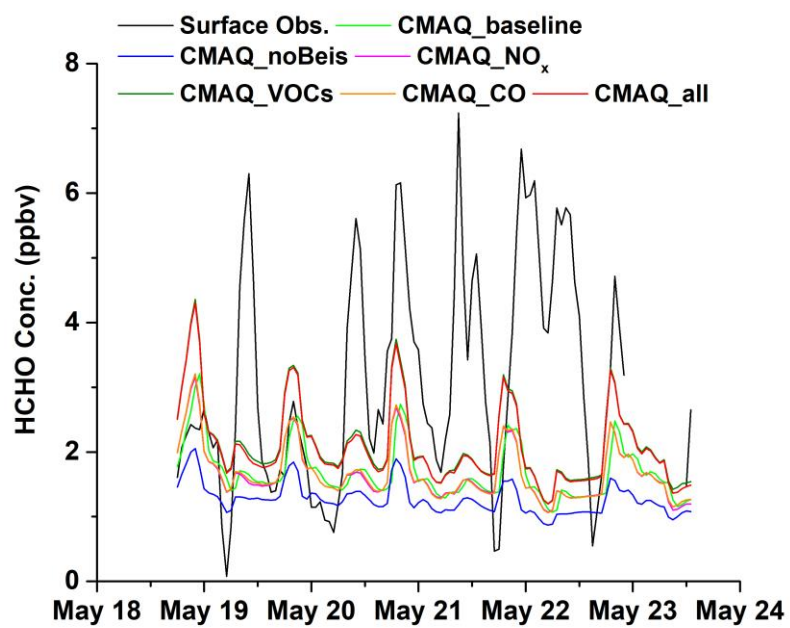

33
